# Supplementary material for: Novel Anion Exchange Membrane Based on Poly(Pentafluorostyrene) Substituted with Mercaptotetrazole Pendant Groups and Its Blend with Polybenzimidazole for Vanadium Redox Flow Battery Applications
Source: MDPI journal article supplement (doi:10.3390/polym12040915), 2020-04-15
Supplement: s1 [file s1]

# Novel anion exchange membrane based on poly(pentafluorostyrene) substituted with mercaptotetrazole pendant groups and its blend with polybenzimidazole for vanadium redox flow battery application

Hyeongrae Cho,<sup>1</sup> Vladimir Atanasov,<sup>1</sup> Henning M Krieg,<sup>2</sup> Jochen A Kerres<sup>1,2,3</sup>

<sup>1</sup>Institute of Chemical Process Engineering, University of Stuttgart, 70199 Stuttgart, Germany

<sup>2</sup> Faculty of Natural Science, North-West University, Focus Area: Chemical Resource Beneficiation, Potchefstroom 2520, South Africa

<sup>3</sup> Forschungszentrum Jülich GmbH, Helmholtz Institute Erlangen-Nürnberg for Renewable Energy, 91058 Erlangen, Germany

Correspondence: [hyeongrae.cho@icvt.uni-stuttgart.de](mailto:hyeongrae.cho@icvt.uni-stuttgart.de); [j.kerres@fz-juelich.de](mailto:j.kerres@fz-juelich.de)

Table S1. Optimization for PPFSt-MTZ synthesis.

| Entry | Solvent   | Equivalents of 1-(2-Dimethylaminoethyl)-5-mercaptotetrazole | Reaction conditions | Substitution Results*        |
|-------|-----------|-------------------------------------------------------------|---------------------|------------------------------|
| 1     | NMP / MEK | 5                                                           | 80 °C, 18 hours     | Low substitution (1% DOS)    |
| 2     | MEK       | 1                                                           | 55 °C, 72 hours     | No substitution              |
| 3     | NMP / MEK | 5                                                           | 80 °C, 72 hours     | Low substitution (15% DOS)   |
| 4     | NMP / MEK | 5                                                           | 95 °C, 72 hours     | Used in this study (41% DOS) |
| 5     | NMP / MEK | 5                                                           | 95 °C, 168 hours    | 40 % DOS                     |

\* Degree of substitution (DOS) was calculated by F-NMR

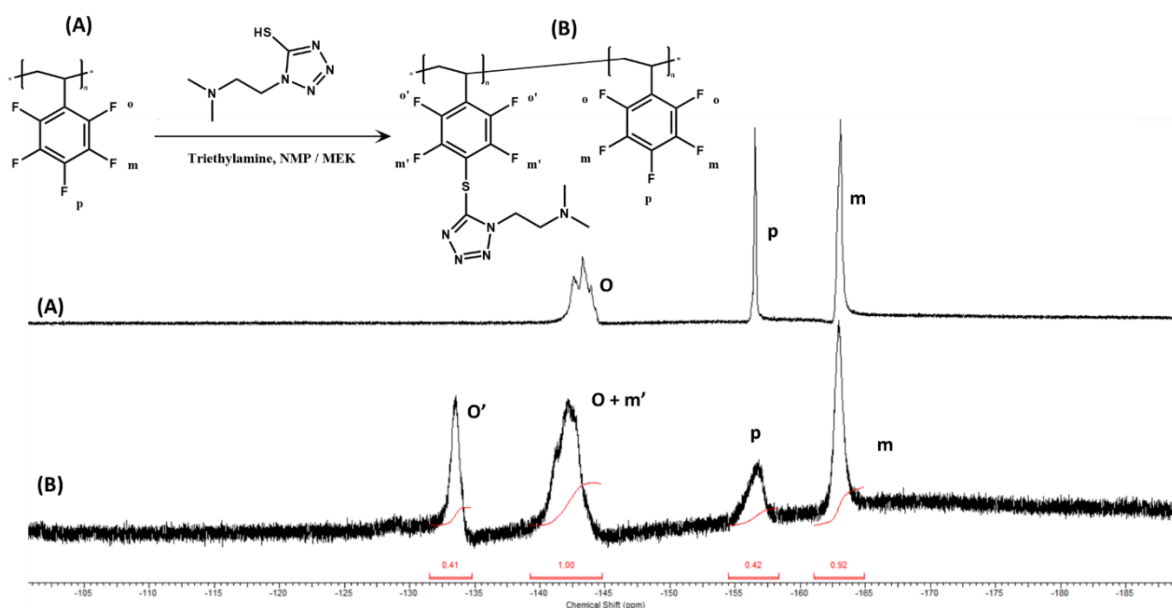

Figure S1. Calculation of degree of substitution confirming 41%.

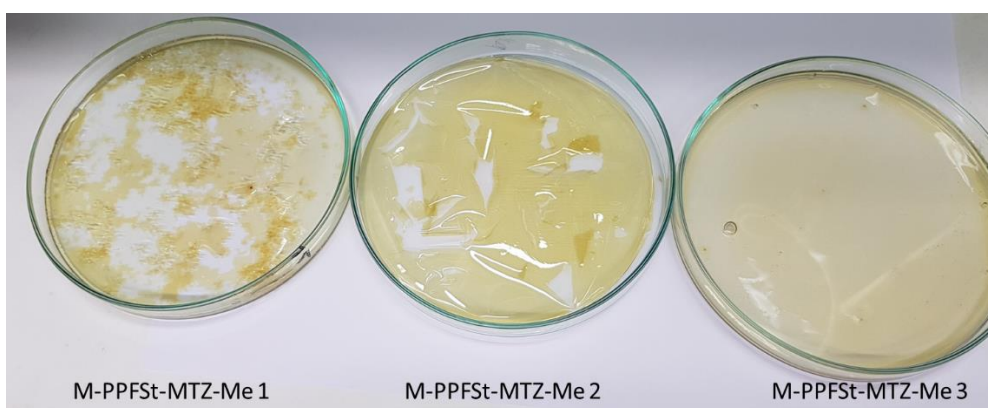

Figure S2. Photographs of the blend membranes.

Table S2. The blend membranes preparation.

| Membrane         | M-PPFSt-MTZ : F6-PBI<br>(by weight) | Membrane formation<br>(see Figure S2) |
|------------------|-------------------------------------|---------------------------------------|
| M-PPFSt-MTZ-Me 1 | 9 : 1                               | Brittle                               |
| M-PPFSt-MTZ-Me 2 | 8 : 2                               | Brittle                               |
| M-PPFSt-MTZ-Me 3 | 7 : 3                               | Ductile                               |
| M-PPFSt-MTZ-Me 4 | 6 : 4                               | Ductile                               |

The blend membrane of M-PPFSt-MTZ-Me 3 was mechanically stable after drying the

solvent. Therefore, blend membranes of M-PPFSt-MTZ-Me 3 and M-PPFSt-MTZ-Me 4 were prepared as larger membranes onto glass plate for the investigation in this study.

As seen in the Figure S3 (a), a strong peak  $2957\text{ cm}^{-1}$  can be assigned to C-H vibration of N-CH<sub>3</sub> from the 1-(2-dimethylaminoethyl)-5-mercaptopotetrazole. A strong peak at  $1264\text{ cm}^{-1}$  can be assigned to the iodomethane by a nucleophilic substitution of iodide. The peaks at  $2200$  and  $2400\text{ cm}^{-1}$  can be assigned to the loss of side chains, 1-(2-dimethylaminoethyl)-5-mercaptopotetrazole. Above  $340^{\circ}\text{C}$ , polymer main back bone degradation was observed for all polymers, PPFSt, PPFSt-MTZ and M-PPFSt-MTZ (Figure S3 (b)).

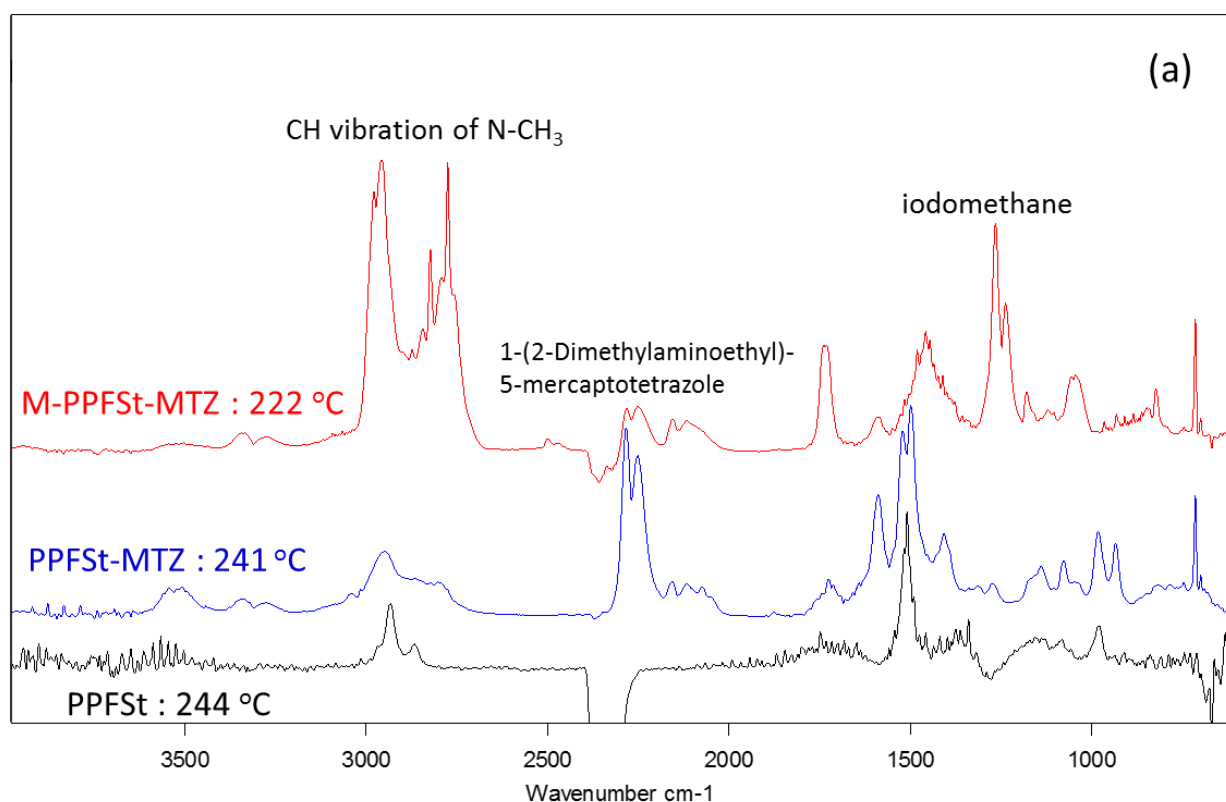

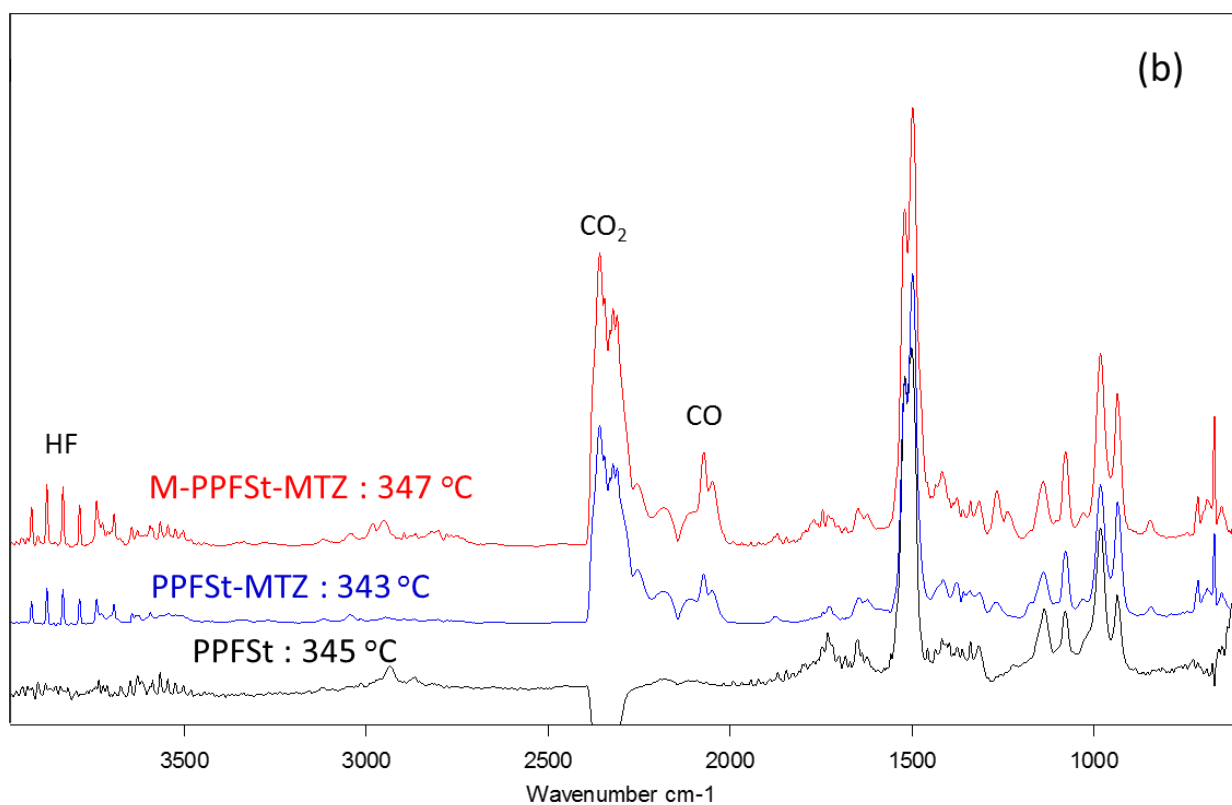

Figure S3. FT-IR spectrum of decomposed gases from first degradation step (a) and polymer main chain degradation (b).
